# Supplementary material for: Rapid, morphologically controllable, large-scale synthesis of uniform Y(OH)3 and tunable luminescent properties of Y2O3:Yb3+/Ln3+ (Ln = Er, Tm and Ho)
Source: Royal Society of Chemistry journal article supplement (doi:10.1039/c2jm32412a), 2012-01-01
Supplement: c2jm32412a.pdf [file c2jm32412a.pdf]

## Support Information

### **Rapid, large-scale production, morphology controllable synthesis of uniform Y(OH)<sub>3</sub> and tunable luminescent properties of Y<sub>2</sub>O<sub>3</sub>:Yb<sup>3+</sup>/Ln<sup>3+</sup> (Ln = Er, Tm and Ho)**

Shaohua Huang,<sup>a</sup> Jie Xu,<sup>a</sup> Zhengguo Zhang,<sup>b</sup> Xiao Zhang,<sup>a</sup> Liuzhen Wang,<sup>a</sup> Shili Gai,<sup>a</sup> Fei He,<sup>a</sup> Na Niu,<sup>a</sup> Milin Zhang,<sup>a</sup> and Piaoping Yang\*<sup>a</sup>

<sup>a</sup> *Key Laboratory of Superlight Materials and Surface Technology, Ministry of Education, Harbin Engineering University, Harbin 150001, P. R. China*

<sup>b</sup> *College of Science, Harbin Engineering University, Harbin 150001, P. R. China*

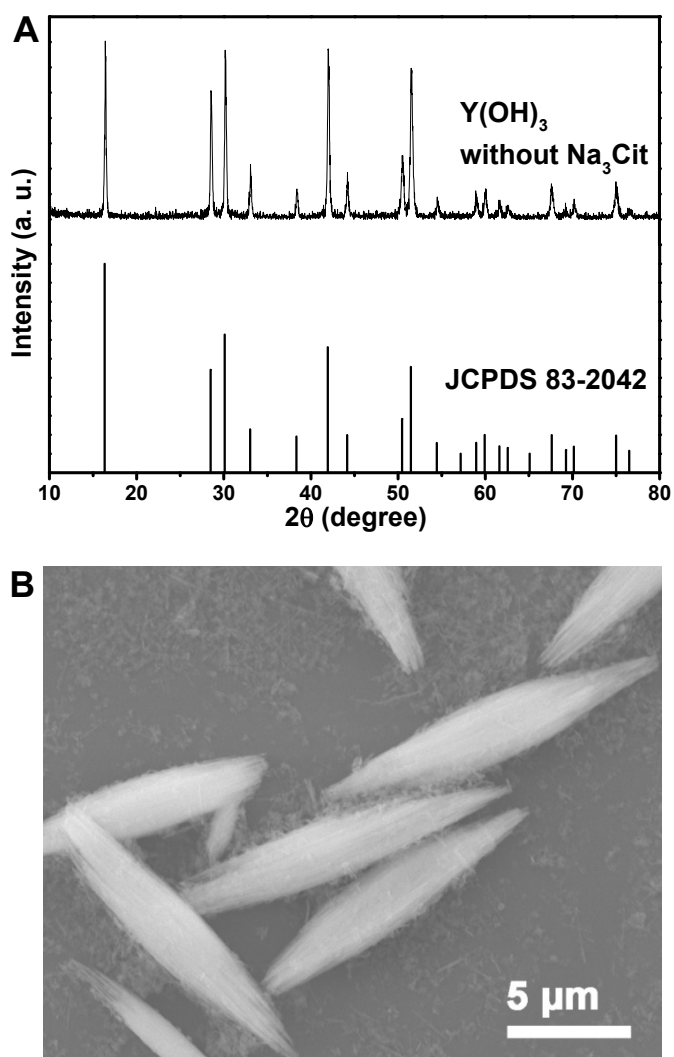

**Fig. S1** (A) XRD patterns and (B) SEM images of Y(OH)<sub>3</sub> prepared at 90 °C for 2 h under 4.8 g NaOH without Na<sub>3</sub>Cit.

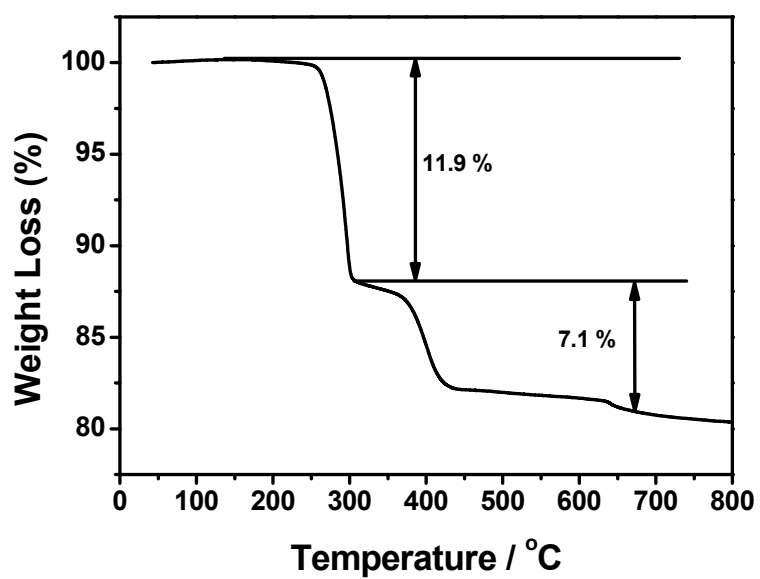

**Fig. S2** TGA curve of the as-prepared Y(OH)<sub>3</sub> precursor.

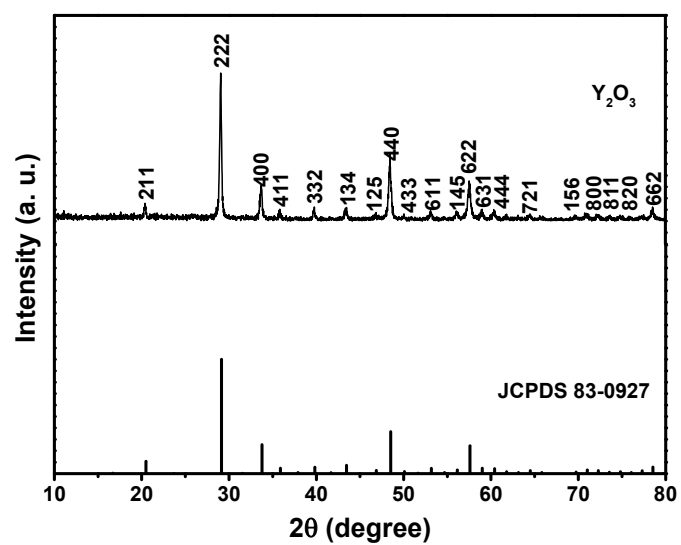

**Fig. S3** XRD pattern of  $Y_2O_3$  obtained after calcination at 800 °C for 2 h.
